# Supplementary material
Source: HighWire-hosted journal article supplement (https://thorax.bmj.com/highwire/filestream/174481/field_highwire_adjunct_files/0/Thorax_Figure1A_156836.pdf)

$p=0.322$

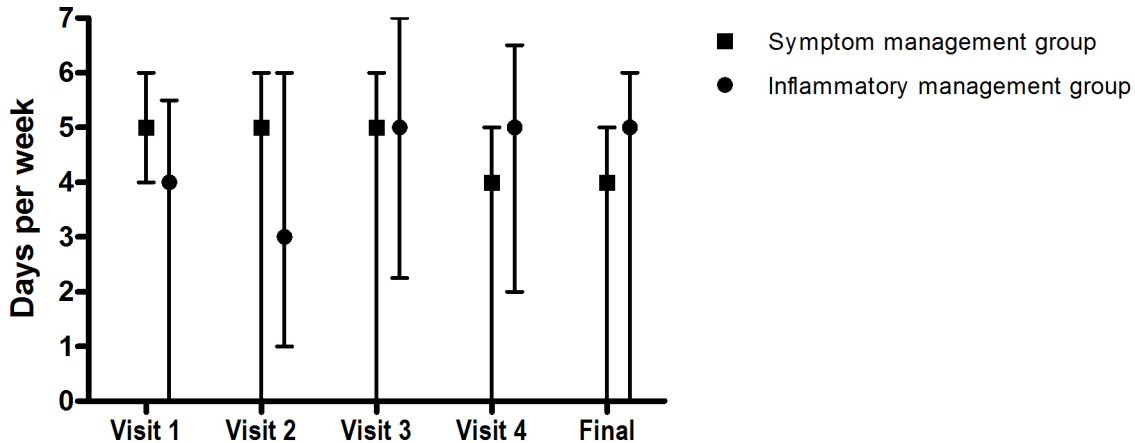

Supplement: Thorax_Figure1A_156836.pdf [file Thorax_Figure1A_156836.pdf]
